# Supplementary material for: Chemogenetic profiling reveals PP2A‐independent cytotoxicity of proposed PP2A activators iHAP1 and DT‐061
Source: PubMed Central journal article supplement (PMC9289710; doi:10.15252/embj.2022110611), 2022-06-13
Supplement: EMBJ-41-e110611-s012.pdf [file EMBJ-41-e110611-s012.pdf]

## Expanded View Figures

**Figure EV1. Perphenazine, iHAP1 and DT-061 do not activate PP2A complexes *in vitro*.**

- A Titration experiment of different PP2A holoenzyme preparations to determine appropriate concentration to use in enzymatic assays. Experiment was performed twice using the concentrations of enzyme stated in the figure. Shown is one representative experiment.
- B–E *In vitro* dephosphorylation assays using model phosphopeptides and purified PP2A holoenzymes. The phosphopeptides were incubated with specific PP2A holoenzymes together with PPZ, iHAP1 or DT-061 at the indicated concentrations. The reaction was stopped after 15 min, and the amount of phosphate released was measured. In (E) substrates are BRCA2 WT: P(pS)QKAEITELSTILEESGSQW and BRCA2 2A: P(pS)QKAEITEASTALEESGSQW. Mean and SD from three technical replicates of one out of three independent experiments is shown. Experiment in (E) is representative of two independent experiments.
- F Injection of PPP2R1A (300  $\mu$ M) into the ITC buffer (5% DMSO) used for the DT-061, iHAP experiments. The experiments were performed at 25°C. No significant effects due to dilution of protein (control experiment for Fig 1B)

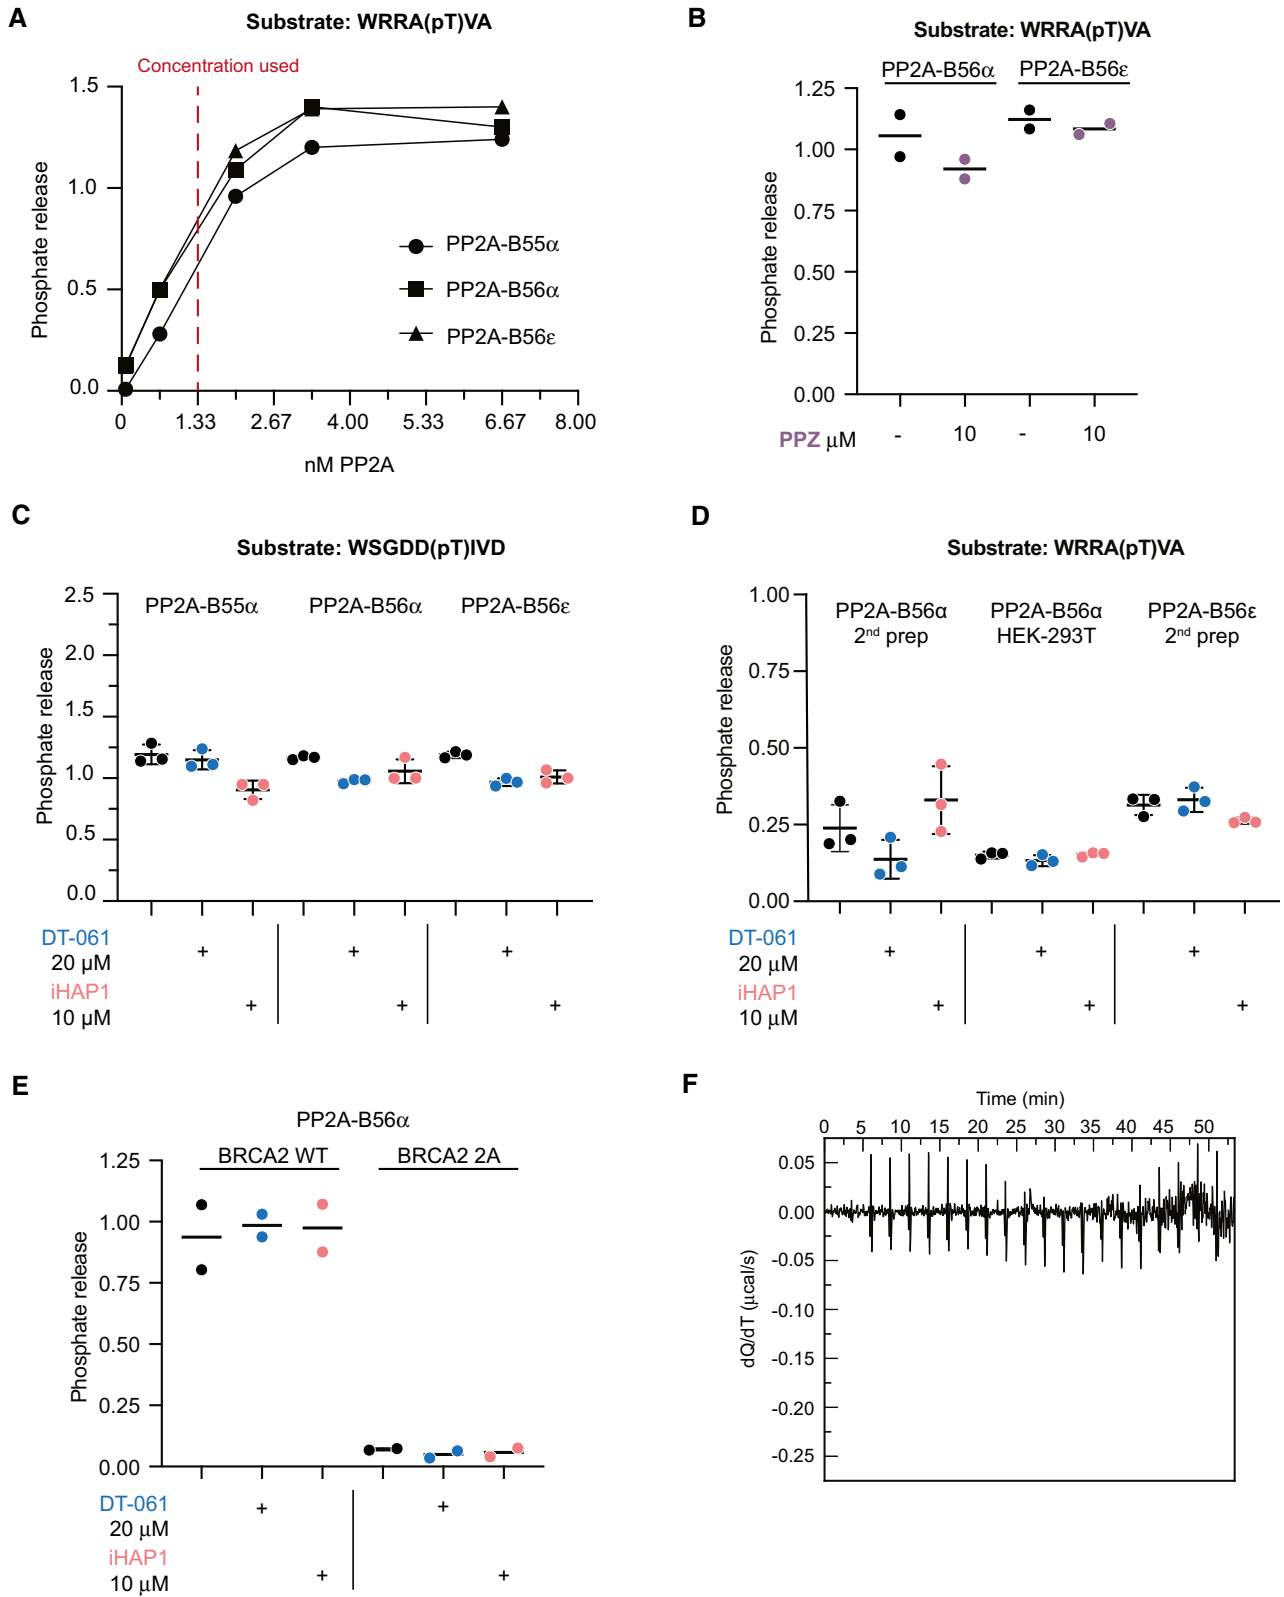

Figure EV1.

**Figure EV2. *In vivo* and structural analysis of drug activity on cells.**

- A CRISPR-Cas9-inducible HeLa cell lines for PP2A regulatory subunits. Western blotting shows the removal of the indicated B56 subunits 3 and 12 days after addition of doxycycline, respectively. Actin was used as loading control. At least three biological replicates of the experiment were performed.
- B Incubate growth assay using a HeLa cell line stably expressing inducible YFP-B56 $\alpha$ . Induced cells were treated with Doxycycline for 12 h before imaging. Cell was treated with 20  $\mu$ M DT-061 or DMSO (Ctrl). Experiment was repeated in three times independently of each other with each experiment performed in technical triplicate. A representative independent experiment is shown with mean and SD.
- C A total cell extract was prepared from HeLa cells stably expressing doxycycline-inducible YFP-B56 $\alpha$ . Cells were either untreated or expression induced for 24 h with Doxycycline and the complexes in the cell extracts separated on a Superdex200 column. The migration of molecular weight markers or recombinant untagged B56 $\alpha$  is indicated on top. The fractions were analyzed by quantitative Licor western blot for PP2A/A, B56 $\alpha$  and PP2A/C. The ratio of B56 $\alpha$  or Venus-B56 $\alpha$  to PP2A/A in the peak fractions is shown below. PP2A/C levels co-migrating with PPP2R1A increased 2–3-fold in the sample where YFP-B56 $\alpha$  was induced. Experiment was performed once.
- D (i) The superposition of the crystallographic electron densities maps of PDB 2IAE chain a,b,c (green) and PDB 3FGA (light pink) with cryo-EM map EMD-0510 (gray) at a map threshold of 0.25 shows that in all three maps, density is protruding into the center of the horseshoe-shaped PP2A holoenzyme at the same position (closeup, right). The fits of all three PP2A structures—PDB 6NTS (ii), PDB 3FGA (iii) and PDB 2IAE, (chain a,b,c) (iv)—into their respective densities show that in all three cases, this area of density was attributed to the C-terminal tail of the PP2A catalytic subunit. In the case of PDB 6NTS, the overall map quality and local resolution in that area reveals less easily interpretable features than in the case of PDBs 3FGA/2IAE. Only the last three C-terminal tail residues (307-9) were built, and the DT061 ligand (red) was modeled right next to them. This leaves most of the visible extra density (asterisk) uninterpreted (ii), in a position where in the higher resolution models of PP2A/C (3FGA/2IAE) further residues of the PP2A/C C-terminus have been placed.

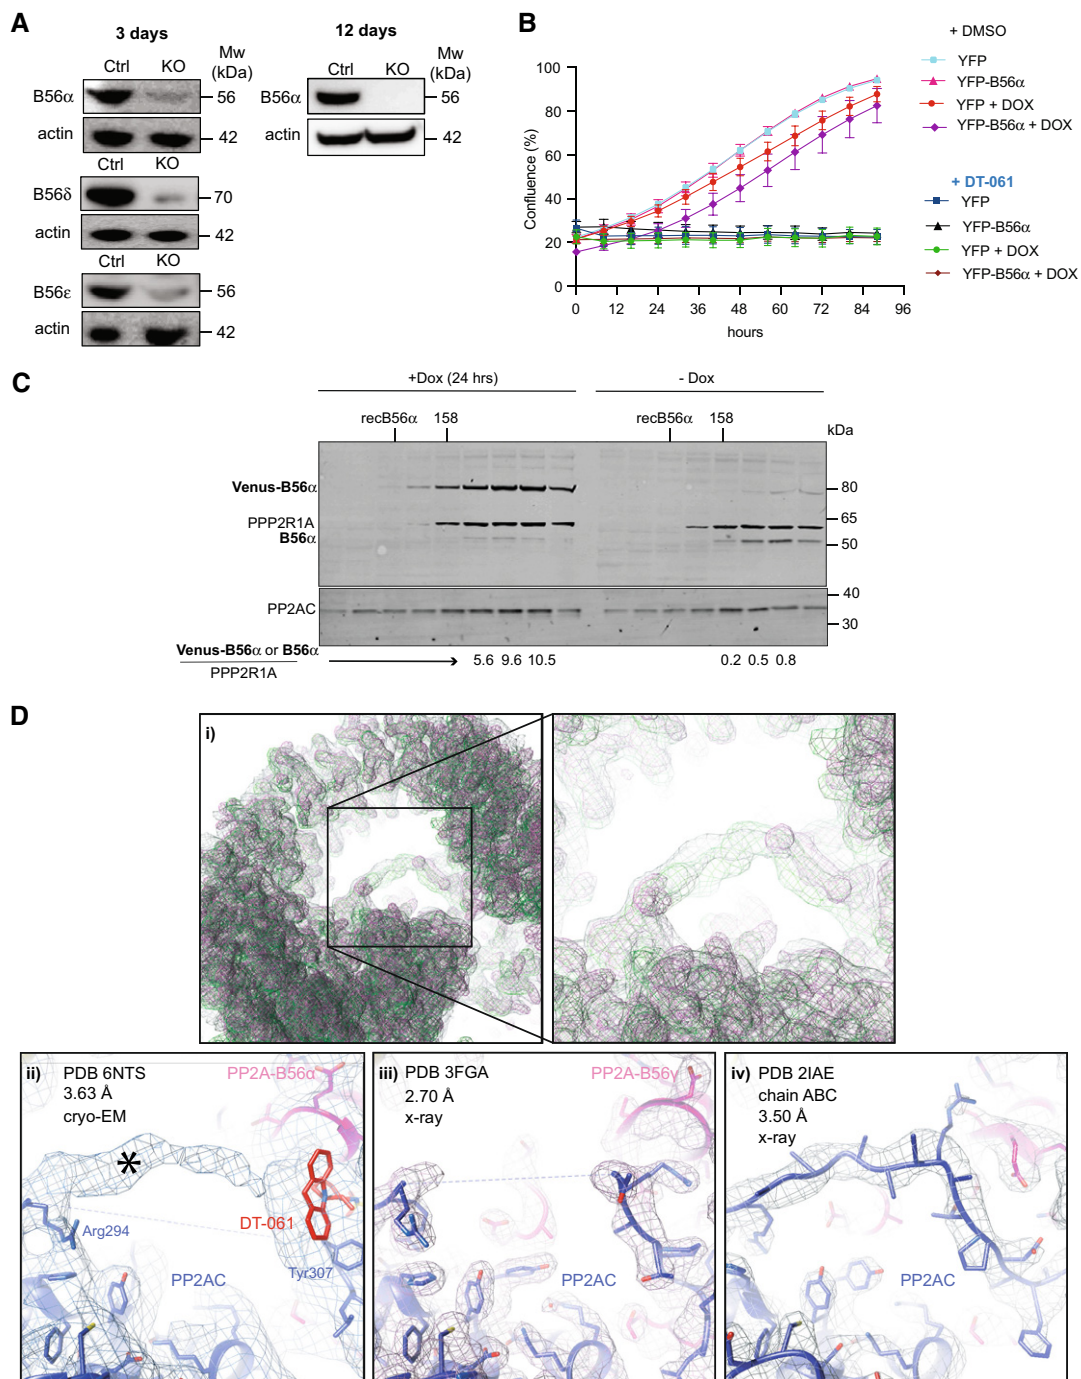

Figure EV2.

**Figure EV3. Compound titration and validation of CRISPR screen results.**

- A Viability of RPE1-hTERT P53<sup>-/-</sup> FLAG Cas9 cells with increasing concentrations of iHAP1 or DT-061 to determine LD20. Mean and SD of three biological replicates is shown.
- B Protein depletion efficiency after RNAi-treatment. Actin was used as loading control. The experiment was performed three times.
- C Sensitivity of HeLa Rod1 KO cells to 0.5  $\mu$ M iHAP1. Western blot to confirm Rod1 depletion levels (left) and growth curves for the indicated conditions (right).
- D Sensitivity of HeLa Rod1 KO to DT-061 or iHAP1 determined using SRB assay.

Data information: (C and D) Mean and SD of three independent experiments are shown.

**A**

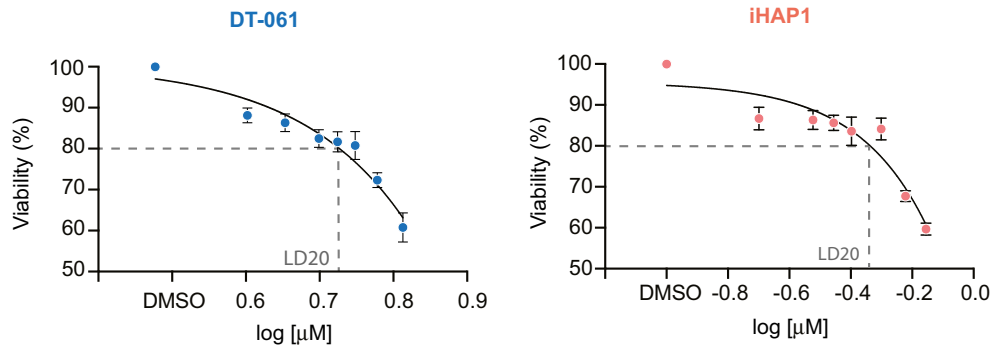

**B**

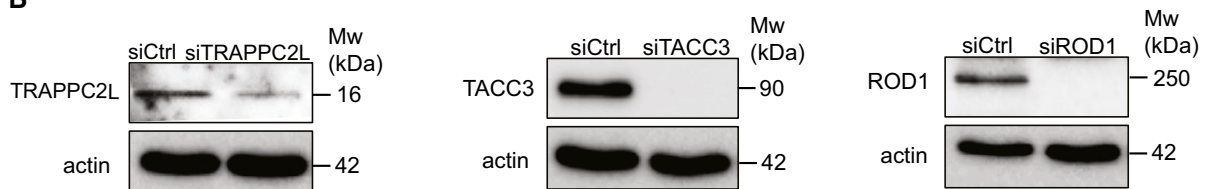

**C**

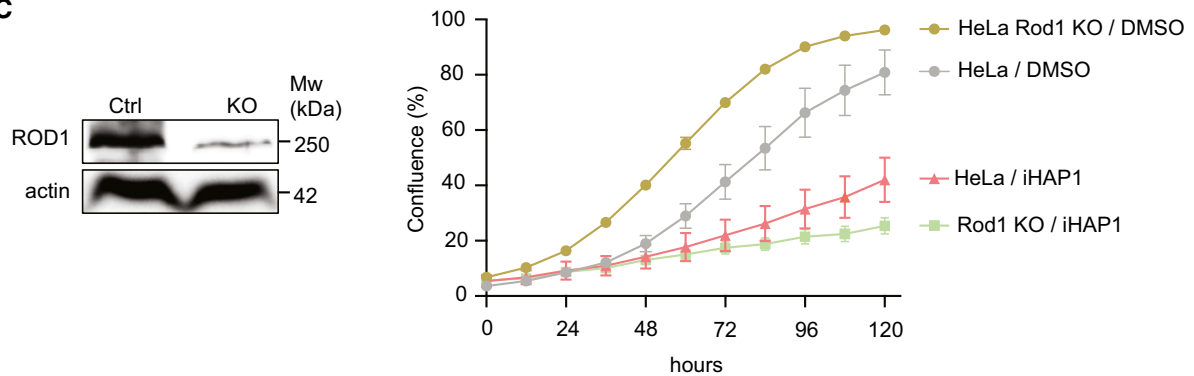

**D**

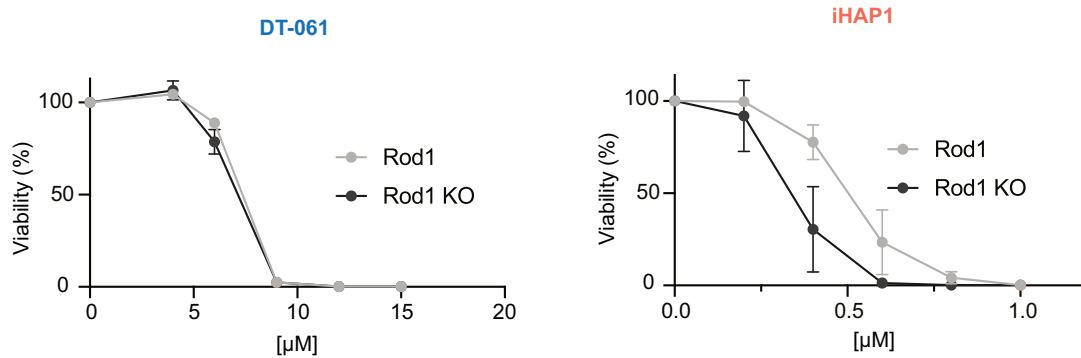

Figure EV3.

**Figure EV4. Analysis of mitotic phenotypes in cells treated with DT-061 or iHAP1.**

- A Representative spinning-disk confocal microscopy time-series of mitosis in U2OS cells stably expressing H2B-GFP/mCherry- $\alpha$ -tubulin following indicated treatments. Scale bar indicates 10  $\mu$ m.
- B Representative images of U2OS mitotic spindles in metaphase following indicated treatments, immunostained with  $\alpha$ -tubulin antibody. DNA was counterstained with DAPI (cyan). Scale bar indicates 10  $\mu$ m.
- C Illustration describing the method used for measuring the amount of total, spindle and astral microtubules.
- D Quantification of the number of microtubules in metaphase-arrested mitotic cells following indicated treatments. The mean and SD are plotted from three independent experiments (Total no. of cells = 48 (DMSO), 45 (30  $\mu$ M DT-061+APC/C in.) and 48 (2  $\mu$ M iHAP1+APC/C in.)). *P*-values were calculated using Student's *t*-test or Mann-Whitney *U* test (unpaired, two-tailed). See Materials and Methods for more details. ns, not significant, \*\*\*\**P* < 0.0001.

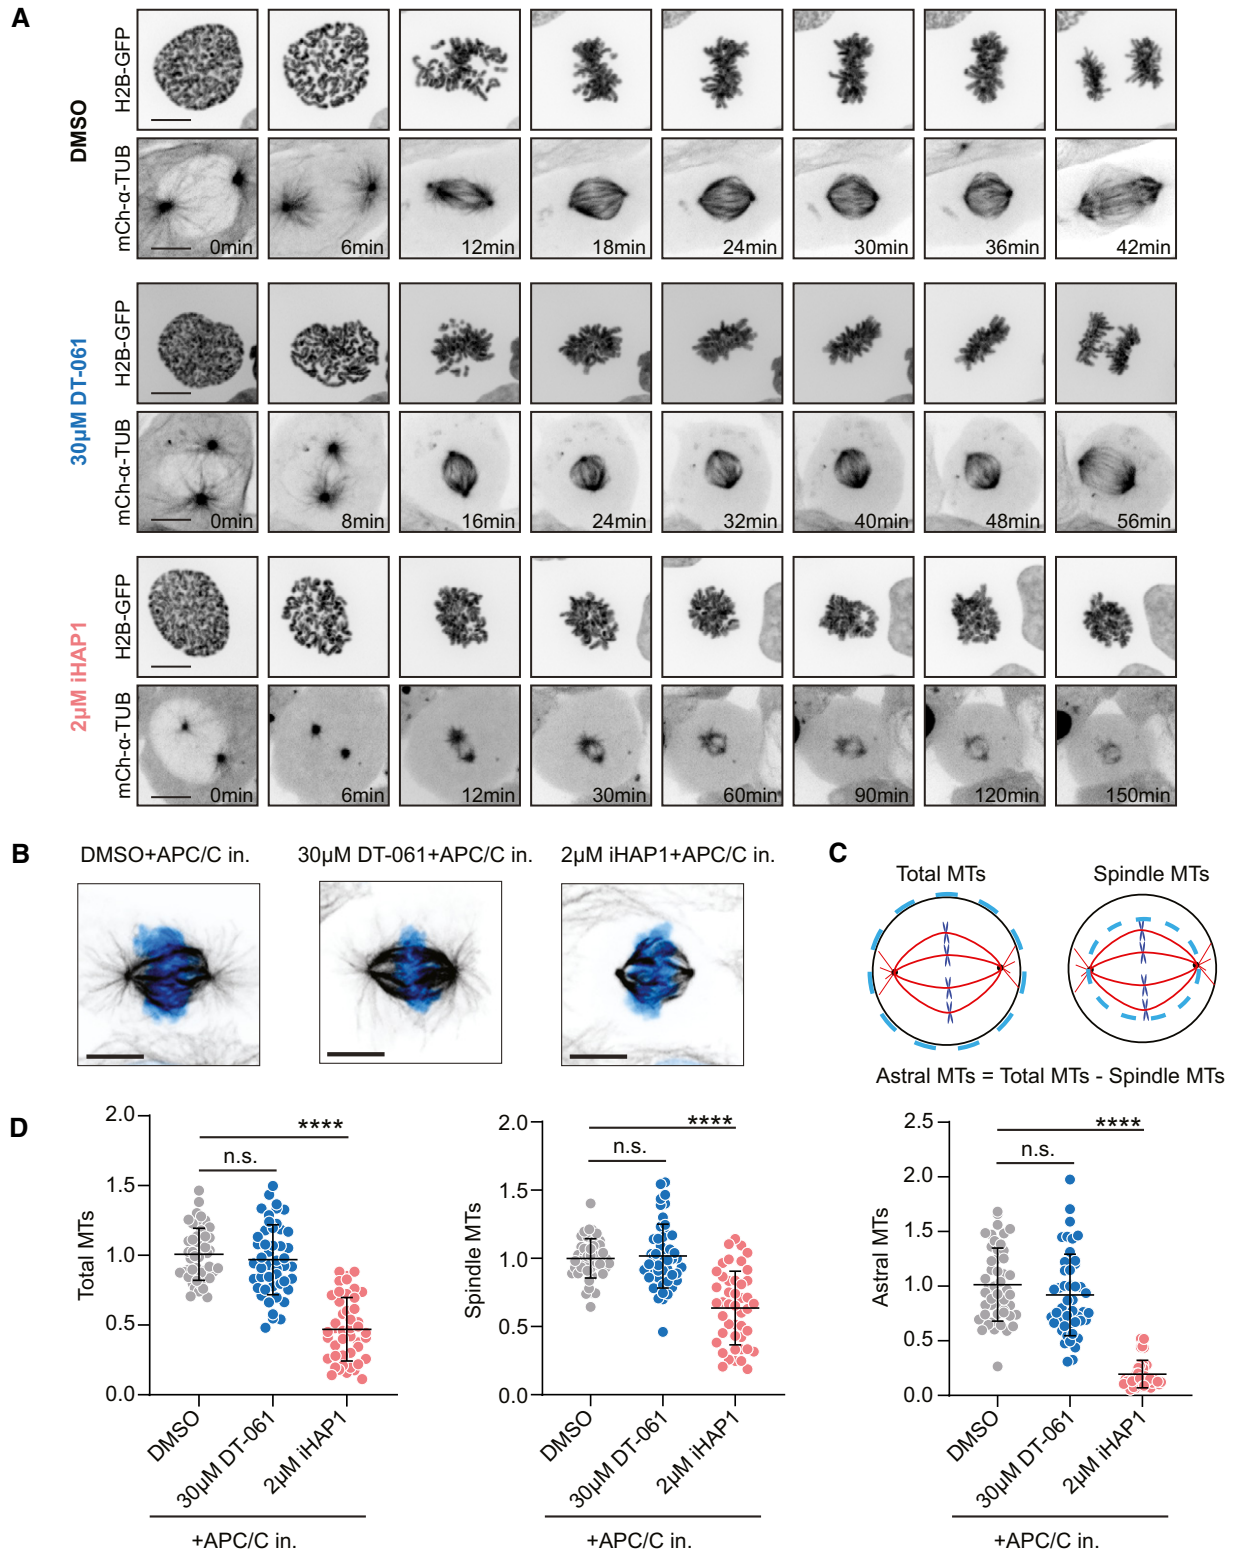

Figure EV4.



**Figure EV5. Analysis of DT-061 effects on Golgi.**

- A Immunofluorescence analysis of Golgi using an antibody against GM130. The indicated cell lines were treated with 20  $\mu$ M DT-061 for 30 min before fixation. Representative images shown. Scale bar 5  $\mu$ m.
- B Percentage of cells showing each phenotype after treatment with DT-061. Number of cells analyzed per condition from a single experiment is shown.
- C Molar quantities of sphingolipid classes detected in MCF7 cells after feeding with the precursor sphingosine or treatment with vehicle (DMSO). MCF7 cells were co-treated with 15  $\mu$ M DT-061, 1.5  $\mu$ M iHAP1, 3  $\mu$ g/ml Brefeldin A or vehicle (DMSO). The determined molar quantities of sphingolipid classes were normalized to that of PC. The presented values represent averages of five independent experiments, and statistical analysis was performed using an independent *t*-test. \**P* < 0.05, \*\**P* < 0.01, \*\*\**P* < 0.001, \*\*\*\**P* < 0.0001. Cer: ceramide, HexCer: hexosylceramide, PC: phosphatidylcholine and SM: sphingomyelin.
- D Growth curves of HeLa cells treated with the indicated combinations and concentration of drugs. The results shown are representative of four independent experiments.

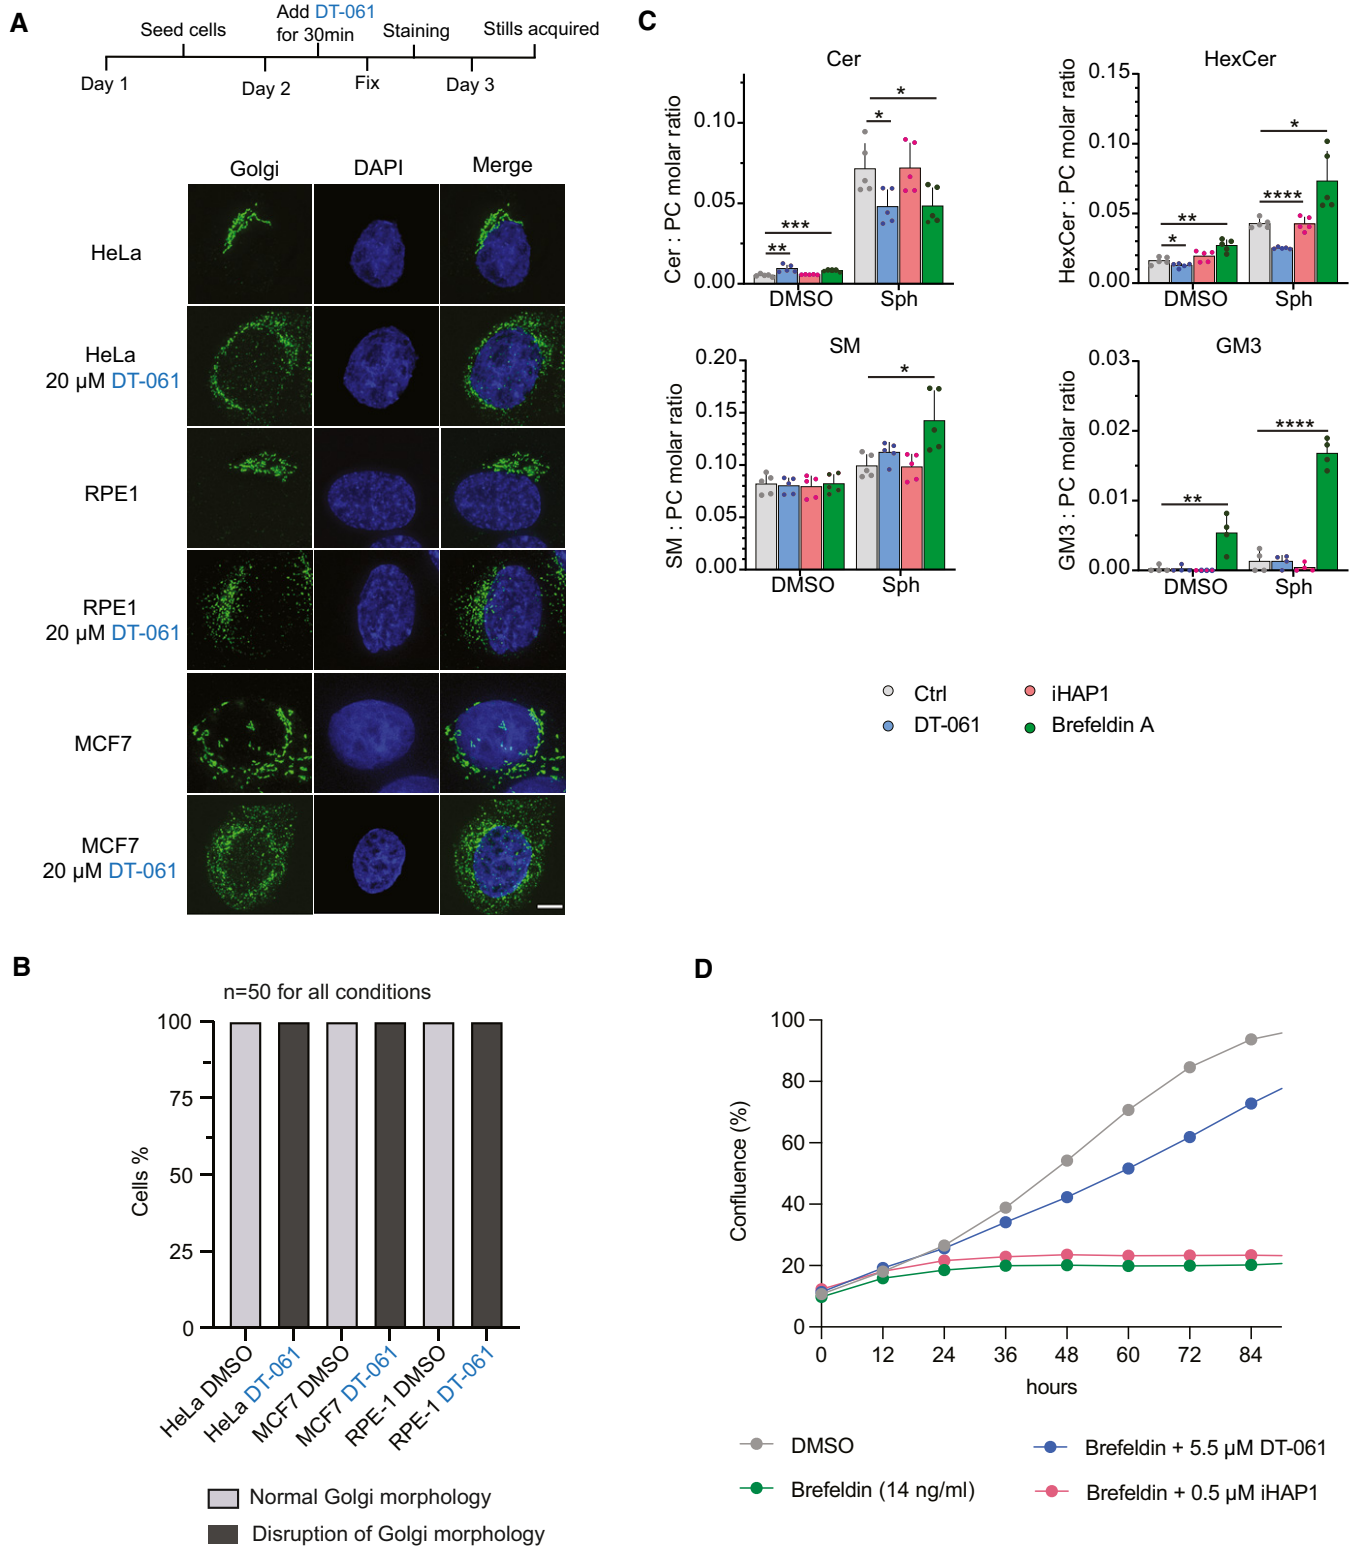

Figure EV5.

## Funding Information – Author Query

**AUTHOR:** Please check that the funding details given below match the details given in the Acknowledgement and provide any missing funder details. In compliance with certain funding agencies (e.g., US Department of Energy), please add the FundRef DOI(s), which can be found, for example, at: <http://www.wiley-vch.de/fundref/>

- 1) Please check that the funding details given below list all funding agencies and grant numbers given in the Acknowledgement and provide any missing funders and funder DOIs where required by you funding agency with the proof corrections.
- 2) Please check that the funder agency name and DOI is provided according to the official FundRef listing.

| FundRef funding agency name          | FundRef Doi           | Grant number                                                                                                |
|--------------------------------------|-----------------------|-------------------------------------------------------------------------------------------------------------|
| Novo Nordisk Fonden (NNF)            | 10.13039/501100009708 | NNF14CC0001, NNF20OC0065098, NNF18OC0053124, NNF18CC0033876, NNF19OC0058504, NNF18OC0032996, NNF17CC0027852 |
| Danish Cancer Society                | 10.13039/100015459    | R146-A9322, R269-A15586-B17                                                                                 |
| Independent Research Fund Denmark    | 10.13039/501100011958 | 8021-00101B, 0134-00199B, 7016-00055, 6108-00542B                                                           |
| Swiss National Fund                  |                       | P2EZIP3_178624                                                                                              |
| Lundbeckfonden (Lundbeck Foundation) | 10.13039/501100003554 | 2017-3212, R215-2015-4081                                                                                   |
| NIH/NIGMS                            |                       | R35GM119455                                                                                                 |
| NIH/NCI                              |                       | R33CA225458                                                                                                 |
| Wellcome Trust (WT)                  | 10.13039/100010269    | 202811                                                                                                      |
